# Supplementary material
Source: MDPI journal article supplement (https://www.mdpi.com/2227-9040/11/4/222)
Supplement: s1 [file s1]

# RBD-Modified Polyaniline-Based Label-Free Immunosensor for Sensitive Impedimetric Detection of Anti-SARS-CoV-2 Antibodies

Tea Romih <sup>1</sup>, Nikola Tasić <sup>1</sup>, Lea Bibič <sup>1</sup>, Ajda Beltram <sup>1</sup>, Ika Fazarinc <sup>1</sup>, Mojca Benčina <sup>2</sup>, Roman Jerala <sup>2</sup> and Samo B. Hočevár <sup>1,\*</sup>

<sup>1</sup> Department of Analytical Chemistry, National Institute of Chemistry, SI-1000 Ljubljana, Slovenia; tea.romih@ctk.uni-lj.si (T.R.); nikola.tasic@ki.si (N.T.); lea.bibic@universite-paris-saclay.fr (L.B.); ab9644@student.uni-lj.si (A.B.); if2912@student.uni-lj.si (I.F.)

<sup>2</sup> Department of Synthetic Biology and Immunology, National Institute of Chemistry, SI-1000 Ljubljana, Slovenia; mojca.bencina@ki.si (M.B.); roman.jerala@ki.si (R.J.)

\* Correspondence: samo.hocevar@ki.si; Tel.: +386-1-4760-230

|                              |                                                                                                                                                                                                                                                                                                                                                                                                                                                                         |
|------------------------------|-------------------------------------------------------------------------------------------------------------------------------------------------------------------------------------------------------------------------------------------------------------------------------------------------------------------------------------------------------------------------------------------------------------------------------------------------------------------------|
| Electrodeposition of aniline | <ul style="list-style-type: none"><li>• 0.1 M aniline in 0.5 M HCl,</li><li>• 5 CV cycles, <math>-0.2</math> V to <math>+0.8</math> V, <math>100\text{ mV s}^{-1}</math>,</li><li>• Electrodeposition carried out in a solution, not in a drop,</li><li>• Freshly distilled aniline was used.</li></ul>                                                                                                                                                                 |
| Crosslinking                 | <ul style="list-style-type: none"><li>• 2.5% glutaraldehyde in 0.1 M PBS, pH=7.4,</li><li>• 10 <math>\mu\text{L}</math> solution applied on a regular working SPCE,</li><li>• 6 <math>\mu\text{L}</math> solution applied on a dual working SPCE.</li></ul>                                                                                                                                                                                                             |
| Sensing element              | <ul style="list-style-type: none"><li>• Positive control: SARS-CoV-2 spike RBD (<math>10\text{ }\mu\text{g mL}^{-1}</math>) in PBS, pH=7.4,</li><li>• Negative control: BSA (<math>10\text{ }\mu\text{g mL}^{-1}</math>) in PBS, pH=7.4,</li><li>• Blocking with Glycine (<math>1.0\text{ M}</math>) in PBS, pH=7.4,</li><li>• 10 <math>\mu\text{L}</math> solution applied on a regular working SPCE, and 6 <math>\mu\text{L}</math> on a dual working SPCE.</li></ul> |
| Impedimetric measurement     | <ul style="list-style-type: none"><li>• Incubation with human anti-SARS-CoV-2 IgG antibody,</li><li>• Optional amplification with unlabeled secondary goat anti-human IgG antibody,</li><li>• Measurements with EIS,</li><li>• 10 <math>\mu\text{L}</math> solution applied on a regular working SPCE, and 6 <math>\mu\text{L}</math> on a dual working SPCE.</li></ul>                                                                                                 |

**Scheme 1.** Experimental conditions during immunosensor preparation steps and measurement.

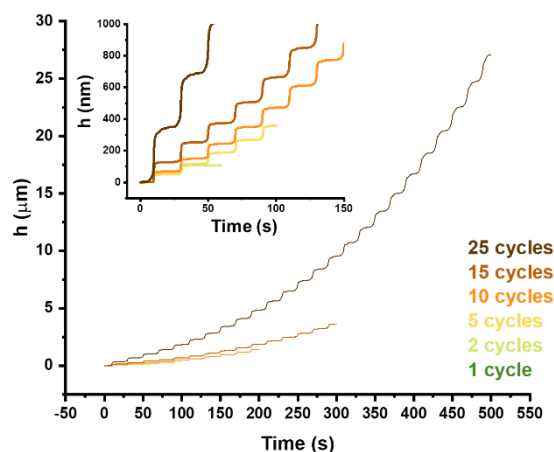

**Figure S1.** Polyaniline thickness growth profiles obtained for different number of electrodeposition cycles. Data were obtained using Eq. 1 presented in the manuscript.

### Complementary enzyme-linked immunosorbent assay (ELISA)

The performance of the electrochemical immunosensor was compared with that of an indirect ELISA assay. A 96-well microplate (Greiner Bio-One No. 675061) was coated with RBD dissolved in PBS at a concentration of 60 ng per well and incubated for one hour at room temperature. In subsequent steps, wells were blocked with 1x ELISA/ELISPOT Diluent (Invitrogen No. 00-4202) for one hour and incubated with human anti-SARS-CoV-2 IgG antibodies and goat anti-human IgG antibodies conjugated to horseradish peroxidase (also diluted in 1x ELISA/ELISPOT Diluent) for another hour each. After each step, the plate was washed four times in a microplate washer (Tecan HydroSpeed) with a washing buffer containing 0.05% Tween-20 and 10% PBS. Finally, 50.0  $\mu$ L of the liquid 3,3',5,5'-tetramethylbenzidine substrate system (Sigma Aldrich No. T8665) was added to each well and left for ten minutes to develop a purple color. After stopping the reaction with 50.0  $\mu$ L of 1.0 M  $\text{H}_3\text{PO}_4$  per well, the absorbances of the samples were measured at 450 nm (signal) and 620 nm (background) using a Synergy Mx multimode microplate reader (BioTek). Antibody concentration was calculated by comparing the real sample's value to the calibration standards' values after subtracting the background absorbance from the signal.
